# Supplementary material for: Bayesian Hierarchical Compositional Models for Analysing Longitudinal Abundance Data from Microbiome Studies
Source: Hindawi journal article supplement (doi:10.1155/2022/4907527), 2022-01-01
Supplement: f1 [file 4907527.f1.pdf]

## **Supplementary material**

We present the Table S1, S2 and S3 as supplementary material.

Table S1: Potential scale reduction factor (labelled psrf) and their upper 95% confidence limits (labelled upper C.I.) of all the estimated parameter  $a_{ij}$ .

| Female's families |        |            | Female's genus |        |            |            |        |            | Male       |        |            |
|-------------------|--------|------------|----------------|--------|------------|------------|--------|------------|------------|--------|------------|
| $a_{ij}$          | psrf   | Upper C.I. | $a_{ij}$       | psrf   | Upper C.I. | $a_{ij}$   | psrf   | Upper C.I. | Parameters | psrf   | Upper C.I. |
| $a_{1,1}$         | 1,0011 | 1,0053     | $a_{1,1}$      | 1      | 1          | $a_{1,4}$  | 1      | 1,0001     | $a_{1,1}$  | 1,0007 | 1,0016     |
| $a_{2,1}$         | 1,0019 | 1,0086     | $a_{2,1}$      | 1      | 1,0002     | $a_{2,4}$  | 1      | 1          | $a_{2,1}$  | 1,0001 | 1,0005     |
| $a_{3,1}$         | 1,0004 | 1,0023     | $a_{3,1}$      | 1      | 1,0004     | $a_{3,4}$  | 1      | 1          | $a_{3,1}$  | 1,0001 | 1,0002     |
| $a_{4,1}$         | 1      | 1          | $a_{4,1}$      | 1,0002 | 1,0002     | $a_{4,4}$  | 1      | 1,0001     | $a_{4,1}$  | 1,0004 | 1,001      |
| $a_{5,1}$         | 1,0011 | 1,0054     | $a_{5,1}$      | 1      | 1          | $a_{5,4}$  | 1      | 1          | $a_{5,1}$  | 1,0006 | 1,0009     |
| $a_{6,1}$         | 1,0001 | 1,0004     | $a_{6,1}$      | 1,0002 | 1,0002     | $a_{6,4}$  | 1      | 1          | $a_{6,1}$  | 1,0001 | 1,0007     |
| $a_{7,1}$         | 1,0007 | 1,0035     | $a_{7,1}$      | 1,0003 | 1,0011     | $a_{7,4}$  | 1      | 1,0002     | $a_{7,1}$  | 1      | 1          |
| $a_{8,1}$         | 1,0005 | 1,0025     | $a_{8,1}$      | 1,0003 | 1,0017     | $a_{8,4}$  | 1,0005 | 1,0014     | $a_{8,1}$  | 1,0001 | 1,0005     |
| $a_{9,1}$         | 1,0019 | 1,0093     | $a_{9,1}$      | 1      | 1,0001     | $a_{9,4}$  | 1      | 1          | $a_{9,1}$  | 1,0004 | 1,0022     |
| $a_{1,2}$         | 1,003  | 1,0148     | $a_{10,1}$     | 1,0005 | 1,0025     | $a_{10,4}$ | 1,0005 | 1,0018     | $a_{1,2}$  | 1      | 1,0002     |
| $a_{2,2}$         | 1,0031 | 1,0155     | $a_{11,1}$     | 1,0001 | 1,0001     | $a_{11,4}$ | 1,0001 | 1,0001     | $a_{2,2}$  | 1,0003 | 1,0013     |
| $a_{3,2}$         | 1      | 1,001      | $a_{12,1}$     | 1,0005 | 1,0008     | $a_{12,4}$ | 1,0002 | 1,0006     | $a_{3,2}$  | 1      | 1,0001     |
| $a_{4,2}$         | 1,0004 | 1,0019     | $a_{13,1}$     | 1,0002 | 1,001      | $a_{13,4}$ | 1,0003 | 1,0014     | $a_{4,2}$  | 1,0001 | 1,0005     |
| $a_{5,2}$         | 1,0028 | 1,014      | $a_{14,1}$     | 1,0002 | 1,0014     | $a_{14,4}$ | 1,0001 | 1,0008     | $a_{5,2}$  | 1,0002 | 1,0003     |
| $a_{6,2}$         | 1,0017 | 1,0081     | $a_{15,1}$     | 1,0003 | 1,0012     | $a_{15,4}$ | 1,0002 | 1,0007     | $a_{6,2}$  | 1,0001 | 1,0001     |
| $a_{7,2}$         | 1,002  | 1,0089     | $a_{16,1}$     | 1,0002 | 1,001      | $a_{16,4}$ | 1      | 1          | $a_{7,2}$  | 1      | 1,0001     |
| $a_{8,2}$         | 1,0013 | 1,0065     | $a_{17,1}$     | 1      | 1          | $a_{17,4}$ | 1      | 1          | $a_{8,2}$  | 1,0003 | 1,0006     |
| $a_{9,2}$         | 1,0034 | 1,0169     | $a_{18,1}$     | 1,0002 | 1,0003     | $a_{18,4}$ | 1      | 1,0001     | $a_{9,2}$  | 1,0001 | 1,0004     |
| $a_{1,3}$         | 1,0001 | 1,0008     | $a_{1,2}$      | 1      | 1,0001     | $a_{1,5}$  | 1,0004 | 1,0005     | $a_{1,3}$  | 1,0002 | 1,001      |
| $a_{2,3}$         | 1,0009 | 1,004      | $a_{2,2}$      | 1      | 1,0002     | $a_{2,5}$  | 1,0001 | 1,0003     | $a_{2,3}$  | 1,0001 | 1,0004     |
| $a_{3,3}$         | 1,0009 | 1,0043     | $a_{3,2}$      | 1      | 1,0001     | $a_{3,5}$  | 1,0004 | 1,0019     | $a_{3,3}$  | 1      | 1          |
| $a_{4,3}$         | 1,0004 | 1,0009     | $a_{4,2}$      | 1      | 1,0001     | $a_{4,5}$  | 1,0001 | 1,0007     | $a_{4,3}$  | 1,0002 | 1,0006     |
| $a_{5,3}$         | 1,0004 | 1,0022     | $a_{5,2}$      | 1,0001 | 1,0004     | $a_{5,5}$  | 1,0002 | 1,0009     | $a_{5,3}$  | 1      | 1          |
| $a_{6,3}$         | 1,0001 | 1,0006     | $a_{6,2}$      | 1,0001 | 1,0003     | $a_{6,5}$  | 1,0002 | 1,0009     | $a_{6,3}$  | 1,0002 | 1,0004     |
| $a_{7,3}$         | 1,001  | 1,0044     | $a_{7,2}$      | 1      | 1          | $a_{7,5}$  | 1      | 1          | $a_{7,3}$  | 1      | 1          |
| $a_{8,3}$         | 1,0003 | 1,0016     | $a_{8,2}$      | 1      | 1,0002     | $a_{8,5}$  | 1,0002 | 1,0006     | $a_{8,3}$  | 1,0002 | 1,0002     |
| $a_{9,3}$         | 1,0011 | 1,0056     | $a_{9,2}$      | 1      | 1,0002     | $a_{9,5}$  | 1,0007 | 1,0031     | $a_{9,3}$  | 1,0002 | 1,0005     |
| $a_{1,4}$         | 1,0006 | 1,0031     | $a_{10,2}$     | 1      | 1          | $a_{10,5}$ | 1      | 1          | $a_{1,4}$  | 1      | 1,0002     |
| $a_{2,4}$         | 1,0003 | 1,0011     | $a_{11,2}$     | 1      | 1          | $a_{11,5}$ | 1,0002 | 1,0003     | $a_{2,4}$  | 1      | 1          |
| $a_{3,4}$         | 1,0004 | 1,0022     | $a_{12,2}$     | 1      | 1          | $a_{12,5}$ | 1,0003 | 1,0005     | $a_{3,4}$  | 1      | 1          |
| $a_{4,4}$         | 1,0001 | 1,0009     | $a_{13,2}$     | 1      | 1          | $a_{13,5}$ | 1,0002 | 1,0006     | $a_{4,4}$  | 1,0006 | 1,0012     |
| $a_{5,4}$         | 1,0001 | 1,0007     | $a_{14,2}$     | 1,0001 | 1,0007     | $a_{14,5}$ | 1      | 1          | $a_{5,4}$  | 1,0014 | 1,002      |
| $a_{6,4}$         | 1,0001 | 1,0003     | $a_{15,2}$     | 1      | 1,0002     | $a_{15,5}$ | 1      | 1,0004     | $a_{6,4}$  | 1      | 1          |
| $a_{7,4}$         | 1      | 1          | $a_{16,2}$     | 1,0002 | 1,0011     | $a_{16,5}$ | 1      | 1,0001     | $a_{7,4}$  | 1,0001 | 1,0001     |
| $a_{8,4}$         | 1,0002 | 1,0008     | $a_{17,2}$     | 1,0001 | 1,0001     | $a_{17,5}$ | 1,0001 | 1,0004     | $a_{8,4}$  | 1,0001 | 1,0003     |
| $a_{9,4}$         | 1,0001 | 1,0005     | $a_{18,2}$     | 1,0002 | 1,0011     | $a_{18,5}$ | 1      | 1          | $a_{9,4}$  | 1,0002 | 1,0008     |
| $a_{1,5}$         | 1      | 1          | $a_{1,3}$      | 1,0001 | 1,0006     | $a_{1,6}$  | 1,0002 | 1,0002     | $a_{1,5}$  | 1      | 1          |
| $a_{2,5}$         | 1,0002 | 1,0009     | $a_{2,3}$      | 1      | 1          | $a_{2,6}$  | 1      | 1,0002     | $a_{2,5}$  | 1      | 1          |
| $a_{3,5}$         | 1,0002 | 1,0007     | $a_{3,3}$      | 1      | 1,0001     | $a_{3,6}$  | 1,0001 | 1,0002     | $a_{3,5}$  | 1      | 1,0001     |
| $a_{4,5}$         | 1,0001 | 1,0007     | $a_{4,3}$      | 1      | 1,0001     | $a_{4,6}$  | 1,0001 | 1,0004     | $a_{4,5}$  | 1,0002 | 1,0007     |
| $a_{5,5}$         | 1,0004 | 1,0014     | $a_{5,3}$      | 1,0001 | 1,0001     | $a_{5,6}$  | 1      | 1          | $a_{5,5}$  | 1,0002 | 1,0002     |
| $a_{6,5}$         | 1      | 1,001      | $a_{6,3}$      | 1,0004 | 1,0004     | $a_{6,6}$  | 1      | 1,0001     | $a_{6,5}$  | 1,0001 | 1,0001     |
| $a_{7,5}$         | 1      | 1,004      | $a_{7,3}$      | 1,0001 | 1,0007     | $a_{7,6}$  | 1      | 1,0002     | $a_{7,5}$  | 1,0001 | 1,0001     |
| $a_{8,5}$         | 1      | 1          | $a_{8,3}$      | 1      | 1          | $a_{8,6}$  | 1,0001 | 1,0001     | $a_{8,5}$  | 1,0001 | 1,0001     |
| $a_{9,5}$         | 1,0001 | 1,0003     | $a_{9,3}$      | 1      | 1,0001     | $a_{9,6}$  | 1      | 1          | $a_{9,5}$  | 1      | 1,0003     |
| $a_{1,6}$         | 1,0006 | 1,0007     | $a_{10,3}$     | 1,0004 | 1,001      | $a_{10,6}$ | 1      | 1          |            |        |            |
| $a_{2,6}$         | 1,0013 | 1,0022     | $a_{11,3}$     | 1      | 1          | $a_{11,6}$ | 1,0002 | 1,001      |            |        |            |
| $a_{3,6}$         | 1      | 1,001      | $a_{12,3}$     | 1,0003 | 1,0003     | $a_{12,6}$ | 1      | 1          |            |        |            |
| $a_{4,6}$         | 1      | 1          | $a_{13,3}$     | 1      | 1          | $a_{13,6}$ | 1,0001 | 1,0002     |            |        |            |
| $a_{5,6}$         | 1,0008 | 1,001      | $a_{14,3}$     | 1      | 1,0001     | $a_{14,6}$ | 1      | 1          |            |        |            |
| $a_{6,6}$         | 1      | 1,002      | $a_{15,3}$     | 1      | 1          | $a_{15,6}$ | 1,0001 | 1,0002     |            |        |            |
| $a_{7,6}$         | 1,0002 | 1,0011     | $a_{16,3}$     | 1,0004 | 1,0017     | $a_{16,6}$ | 1      | 1          |            |        |            |
| $a_{8,6}$         | 1,0002 | 1,0007     | $a_{17,3}$     | 1      | 2 1        | $a_{17,6}$ | 1      | 1,0002     |            |        |            |
| $a_{9,6}$         | 1,0011 | 1,0033     | $a_{18,3}$     | 1      | 1,0001     | $a_{18,6}$ | 1      | 1          |            |        |            |

Table S2: Estimated parameters ( $a_{ij}$ ) and credible interval obtained applying the Proposed Model to the female dataset at genus taxonomic level. The table also contains the percentage of influence that each SPBal $_j$  has on each genus and, in bold, it is represented the percentage of sway that each genus has on the bacterial community

| Genus taxonomic level   |                                              |                                         |                                        |                                        |                                       |                                         |
|-------------------------|----------------------------------------------|-----------------------------------------|----------------------------------------|----------------------------------------|---------------------------------------|-----------------------------------------|
| $a_{ij}$                | Intercept                                    | SPBal $_1$                              | SPBal $_2$                             | SPBal $_3$                             | SPBal $_4$                            | SPBal $_5$                              |
| o_Bacteroidales; f.; g- | 0,7498<br>( -0,35 , 1,94 )<br><b>7,26 %</b>  | -0,0632<br>( -0,15 , 0,01 )<br>15,29 %  | 0,0378<br>( -0,16 , 0,26 )<br>9,14 %   | -0,1482<br>( -0,36 , 0,06 )<br>35,84 % | 0,0464<br>( -0,15 , 0,25 )<br>11,21 % | 0,1180<br>( -0,17 , 0,39 )<br>28,53 %   |
| Other                   | 1,7632<br>( 0,87 , 2,60 )<br><b>17,08 %</b>  | -0,0382<br>( -0,10 , 0,02 )<br>4,99 %   | -0,1557<br>( -0,34 , 0,03 )<br>20,37 % | -0,0768<br>( -0,28 , 0,10 )<br>10,05 % | 0,0069<br>( -0,15 , 0,16 )<br>0,90 %  | -0,4869<br>( -0,84 , -0,15 )<br>63,70 % |
| o_Clostridiales; f.; g- | -0,0878<br>( -1,46 , 1,23 )<br><b>0,85 %</b> | -0,0072<br>( -0,13 , 0,11 )<br>3,03 %   | -0,0567<br>( -0,36 , 0,23 )<br>23,90 % | 0,0430<br>( -0,21 , 0,32 )<br>18,12 %  | 0,0735<br>( -0,23 , 0,40 )<br>30,98 % | -0,0568<br>( -0,41 , 0,23 )<br>23,97 %  |
| f_Lachnospiraceae; g-   | 0,0287<br>( -1,26 , 1,22 )<br><b>0,28 %</b>  | -0,0225<br>( -0,12 , 0,07 )<br>3,77 %   | -0,1609<br>( -0,41 , 0,06 )<br>26,96 % | -0,2148<br>( -0,46 , 0,02 )<br>35,98 % | 0,0235<br>( -0,23 , 0,28 )<br>3,94 %  | -0,1752<br>( -0,54 , 0,10 )<br>29,35 %  |
| g_Blautia               | -0,0348<br>( -1,29 , 1,05 )<br><b>0,34 %</b> | -0,0526<br>( -0,17 , 0,05 )<br>14,36 %  | 0,0286<br>( -0,22 , 0,29 )<br>7,81 %   | -0,0465<br>( -0,28 , 0,17 )<br>12,69 % | 0,1385<br>( -0,12 , 0,42 )<br>37,80 % | -0,1002<br>( -0,44 , 0,16 )<br>27,34 %  |
| g_Clostridium           | -0,0078<br>( -1,18 , 1,08 )<br><b>0,08 %</b> | -0,0837<br>( -0,18 , 0,00 )<br>14,69 %  | -0,0653<br>( -0,29 , 0,14 )<br>11,45 % | -0,2156<br>( -0,44 , 0,01 )<br>37,85 % | 0,0377<br>( -0,18 , 0,26 )<br>6,62 %  | -0,1674<br>( -0,51 , 0,09 )<br>29,39 %  |
| g_Coproccoccus          | -0,0826<br>( -1,42 , 1,14 )<br><b>0,80 %</b> | -0,0301<br>( -0,15 , 0,08 )<br>11,16 %  | 0,0330<br>( -0,22 , 0,30 )<br>12,24 %  | 0,0169<br>( -0,21 , 0,25 )<br>6,28 %   | 0,0920<br>( -0,19 , 0,39 )<br>34,12 % | -0,0976<br>( -0,43 , 0,15 )<br>36,20 %  |
| g_Dorea                 | -0,9311<br>( -2,72 , 0,42 )<br><b>9,02 %</b> | -0,0274<br>( -0,16 , 0,09 )<br>14,71 %  | -0,0351<br>( -0,35 , 0,27 )<br>18,85 % | 0,0107<br>( -0,31 , 0,29 )<br>5,72 %   | 0,0519<br>( -0,27 , 0,38 )<br>27,91 % | -0,0610<br>( -0,43 , 0,24 )<br>32,80 %  |
| g_Eubacterium           | -0,6798<br>( -2,46 , 0,59 )<br><b>6,59 %</b> | -0,0422<br>( -0,17 , 0,07 )<br>33,00 %  | 0,0028<br>( -0,30 , 0,30 )<br>2,18 %   | -0,0250<br>( -0,33 , 0,24 )<br>19,51 % | 0,0546<br>( -0,25 , 0,37 )<br>42,71 % | 0,0033<br>( -0,35 , 0,31 )<br>2,59 %    |
| g_Roseburia             | 0,3644<br>( -0,68 , 1,52 )<br><b>3,53 %</b>  | -0,0362<br>( -0,13 , 0,05 )<br>7,46 %   | 0,1517<br>( -0,07 , 0,41 )<br>31,24 %  | -0,0199<br>( -0,22 , 0,19 )<br>4,11 %  | 0,0980<br>( -0,13 , 0,35 )<br>20,17 % | -0,1798<br>( -0,46 , 0,05 )<br>37,02 %  |
| g_Ruminococcus          | -0,5185<br>( -2,10 , 0,65 )<br><b>5,02 %</b> | -0,0510<br>( -0,18 , 0,07 )<br>13,93 %  | 0,0760<br>( -0,22 , 0,40 )<br>20,79 %  | 0,0019<br>( -0,29 , 0,26 )<br>0,52 %   | 0,2103<br>( -0,11 , 0,56 )<br>57,49 % | -0,0266<br>( -0,38 , 0,26 )<br>7,26 %   |
| f_Ruminococcaceae; g-   | 0,2119<br>( -0,94 , 1,47 )<br><b>2,05 %</b>  | -0,0342<br>( -0,14 , 0,06 )<br>14,74 %  | -0,0091<br>( -0,26 , 0,24 )<br>3,93 %  | 0,0123<br>( -0,20 , 0,24 )<br>5,29 %   | 0,0387<br>( -0,21 , 0,30 )<br>16,69 % | -0,1376<br>( -0,47 , 0,11 )<br>59,35 %  |
| g_Clostridium           | -0,3507<br>( -1,96 , 1,05 )<br><b>3,40 %</b> | -0,0232<br>( -0,15 , 0,09 )<br>7,45 %   | 0,0616<br>( -0,22 , 0,37 )<br>19,81 %  | 0,1107<br>( -0,16 , 0,40 )<br>35,61 %  | 0,0431<br>( -0,26 , 0,35 )<br>13,86 % | -0,0724<br>( -0,45 , 0,22 )<br>23,27 %  |
| g_Phascolarctobacterium | 0,2522<br>( -0,83 , 1,36 )<br><b>2,44 %</b>  | -0,0852<br>( -0,17 , 0,00 )<br>14,76 %  | 0,0527<br>( -0,15 , 0,27 )<br>9,13 %   | -0,0917<br>( -0,31 , 0,12 )<br>15,89 % | 0,0478<br>( -0,16 , 0,27 )<br>8,29 %  | -0,2997<br>( -0,63 , -0,01 )<br>51,93 % |
| g_Desulfovibrio         | -0,1352<br>( -1,48 , 1,04 )<br><b>1,31 %</b> | -0,0303<br>( -0,15 , 0,07 )<br>10,44 %  | 0,0804<br>( -0,18 , 0,37 )<br>27,70 %  | 0,0047<br>( -0,24 , 0,25 )<br>1,62 %   | 0,1415<br>( -0,13 , 0,44 )<br>48,76 % | -0,0333<br>( -0,38 , 0,25 )<br>11,48 %  |
| g_Clostridium           | -0,5888<br>( -2,34 , 0,69 )<br><b>5,70 %</b> | -0,0034<br>( -0,13 , 0,12 )<br>0,87 %   | -0,2154<br>( -0,56 , 0,10 )<br>55,62 % | -0,0306<br>( -0,34 , 0,24 )<br>7,90 %  | 0,0554<br>( -0,28 , 0,41 )<br>14,31 % | -0,0825<br>( -0,48 , 0,23 )<br>21,29 %  |
| g_Akkermansia           | 0,4689<br>( -0,43 , 1,49 )<br><b>4,54 %</b>  | -0,7168<br>( -0,86 , -0,58 )<br>32,70 % | 0,3378<br>( 0,19 , 0,49 )<br>15,41 %   | -0,1117<br>( -0,30 , 0,07 )<br>5,10 %  | 0,8178<br>( 0,67 , 0,97 )<br>37,31 %  | 0,2079<br>( -0,03 , 0,43 )<br>9,49 %    |
| g_Bacteroides           | 3,0652<br>( 2,30 , 3,81 )<br><b>29,70 %</b>  | -0,0890<br>( -0,15 , -0,03 )<br>20,70 % | 0,0608<br>( -0,08 , 0,22 )<br>14,14 %  | -0,0689<br>( -0,23 , 0,06 )<br>16,02 % | -0,0028<br>( -0,13 , 0,13 )<br>0,64 % | -0,2084<br>( -0,44 , 0,01 )<br>48,49 %  |

Table S3: Estimated parameters ( $a_{ij}$ ) and credible interval obtained applying the Proposed Model to the Male dataset. The table also contains the percentage of influence that each SPBal $_j$  has on each family and, in bold, it is represented the percentage of influence that each family has on the bacterial community

| Family taxonomic level |                                              |                                       |                                        |                                        |                                        |
|------------------------|----------------------------------------------|---------------------------------------|----------------------------------------|----------------------------------------|----------------------------------------|
| $a_{ij}$               | Intercept                                    | SPBal $_1$                            | SPBal $_2$                             | SPBal $_3$                             | SPBal $_4$                             |
| f_Alcaligenaceae       | 0,1563<br>( -2,21 , 2,28 )<br><b>2,15 %</b>  | 0,1563<br>( -0,36 , 0,98 )<br>12,87 % | -0,3031<br>( -1,07 , 0,30 )<br>24,95 % | -0,5221<br>( -1,37 , 0,22 )<br>42,98 % | 0,2332<br>( -0,94 , 1,57 )<br>19,20 %  |
| f_Bacteroidaceae       | 0,8131<br>( -1,32 , 3,20 )<br><b>11,20 %</b> | 0,8131<br>( -0,78 , 0,45 )<br>32,49 % | -0,2503<br>( -0,97 , 0,29 )<br>10,00 % | -0,8869<br>( -1,72 , 0,00 )<br>35,44 % | 0,5522<br>( -0,40 , 1,76 )<br>22,07 %  |
| f_Lachnospiraceae      | 1,0084<br>( -1,11 , 3,44 )<br><b>13,89 %</b> | 1,0084<br>( -0,42 , 0,90 )<br>44,65 % | -0,0450<br>( -0,78 , 0,62 )<br>1,99 %  | -0,2582<br>( -1,05 , 0,56 )<br>11,43 % | -0,9467<br>( -2,51 , 0,33 )<br>41,92 % |
| f_Porphyrimonadaceae   | 0,3775<br>( -2,09 , 2,75 )<br><b>5,20 %</b>  | 0,3775<br>( -0,76 , 0,63 )<br>36,48 % | -0,1091<br>( -0,90 , 0,58 )<br>10,55 % | -0,4222<br>( -1,29 , 0,37 )<br>40,80 % | 0,1260<br>( -1,25 , 1,57 )<br>12,18 %  |
| Other                  | 0,4171<br>( -2,03 , 2,87 )<br><b>5,74 %</b>  | 0,4171<br>( -0,62 , 0,88 )<br>40,41 % | 0,0209<br>( -0,74 , 0,78 )<br>2,03 %   | -0,3362<br>( -1,20 , 0,46 )<br>32,57 % | -0,2579<br>( -1,93 , 1,15 )<br>24,99 % |
| f_Rikenellaceae        | 0,1962<br>( -2,50 , 2,71 )<br><b>2,70 %</b>  | 0,1962<br>( -0,79 , 0,86 )<br>26,58 % | -0,0332<br>( -0,87 , 0,78 )<br>4,49 %  | -0,2370<br>( -1,18 , 0,62 )<br>32,13 % | 0,2715<br>( -1,41 , 2,09 )<br>36,80 %  |
| f_Ruminococcaceae      | 0,8821<br>( -1,21 , 3,15 )<br><b>12,15 %</b> | 0,8821<br>( -0,58 , 0,68 )<br>51,91 % | -0,1941<br>( -0,95 , 0,42 )<br>11,42 % | -0,3469<br>( -1,11 , 0,41 )<br>20,42 % | -0,2760<br>( -1,65 , 0,97 )<br>16,25 % |
| f_Veillonellaceae      | 0,2825<br>( -2,04 , 2,43 )<br><b>3,89 %</b>  | 0,2825<br>( -0,21 , 1,20 )<br>31,10 % | -0,2180<br>( -0,98 , 0,42 )<br>24,00 % | -0,2962<br>( -1,09 , 0,41 )<br>32,61 % | 0,1116<br>( -1,28 , 1,53 )<br>12,28 %  |
| f_Prevotellaceae       | 3,1272<br>( 1,50 , 4,70 )<br><b>43,07 %</b>  | 3,1272<br>( -0,13 , 0,93 )<br>67,13 % | -0,4606<br>( -1,13 , 0,03 )<br>9,89 %  | -0,4815<br>( -1,10 , 0,07 )<br>10,34 % | 0,5891<br>( -0,21 , 1,59 )<br>12,65 %  |
